# Supplementary material
Source: publisher figshare collection journal article supplement (https://acs.figshare.com/ndownloader/files/20152613)
Supplement: Supplementary file 1 [file 20152613]

# Visible Light-Driven H<sub>2</sub> Evolution with Cobalt Complexes in Aqueous Solution: Theoretical and Experimental Study

Qinghua Deng<sup>[a]</sup>, Yun Xu<sup>[a]</sup>, Ziqun Wang<sup>[a]</sup>, Tifang Miao<sup>\*[a]</sup>, Xianliang Fu<sup>\*[a]</sup>, and Liancai Xu<sup>[b]</sup>

<sup>[a]</sup> School of Chemistry and Materials Science, Huaibei Normal University, Huaibei 235000, China.

<sup>[b]</sup> Department of Material and Chemical Engineering, Zhengzhou Institute of Light Industry, Zhengzhou 450002, China.

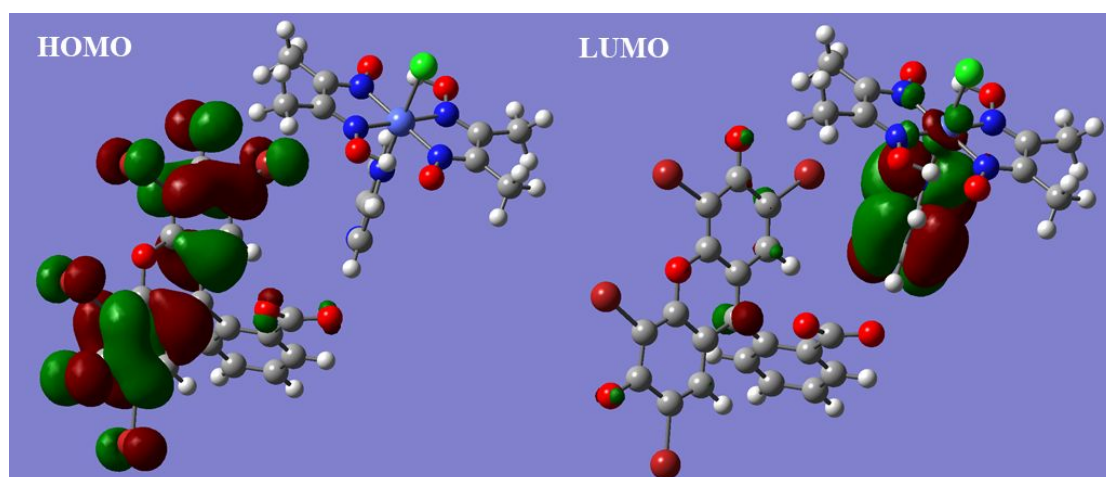

**Figure S1.** Computed the highest-occupied molecular orbital (HOMO) and the lowest-unoccupied molecular orbital (LUMO) of docking structure (**complex 13** and EY<sup>2-</sup>) in the ground state.

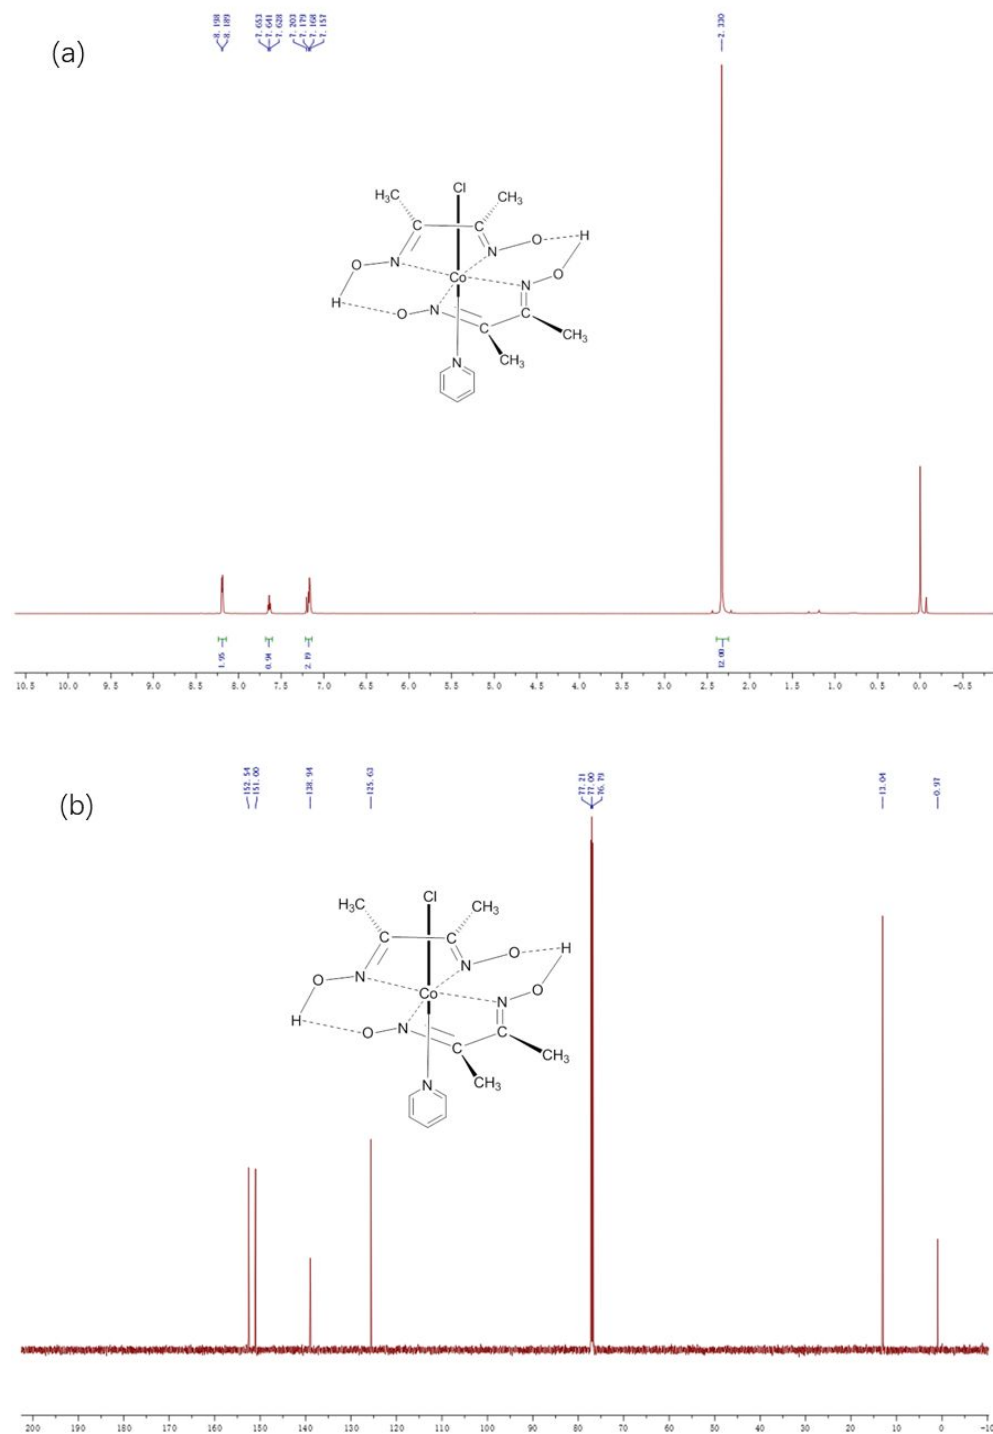

**Figure S2.** (a)  $^1\text{H}$  NMR and (b)  $^{13}\text{C}$  NMR of complex 1.



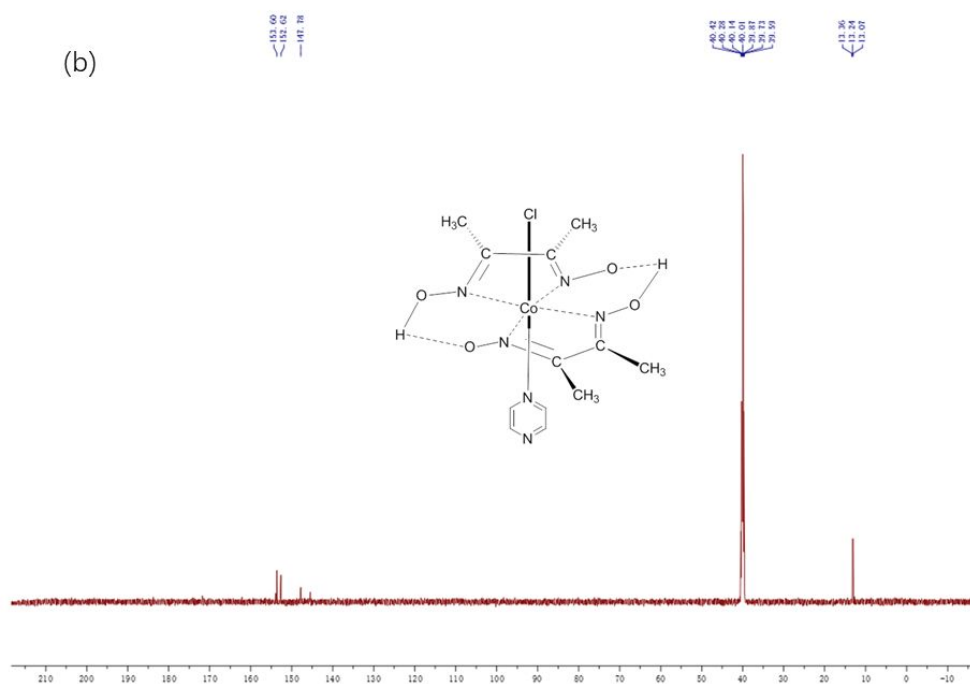

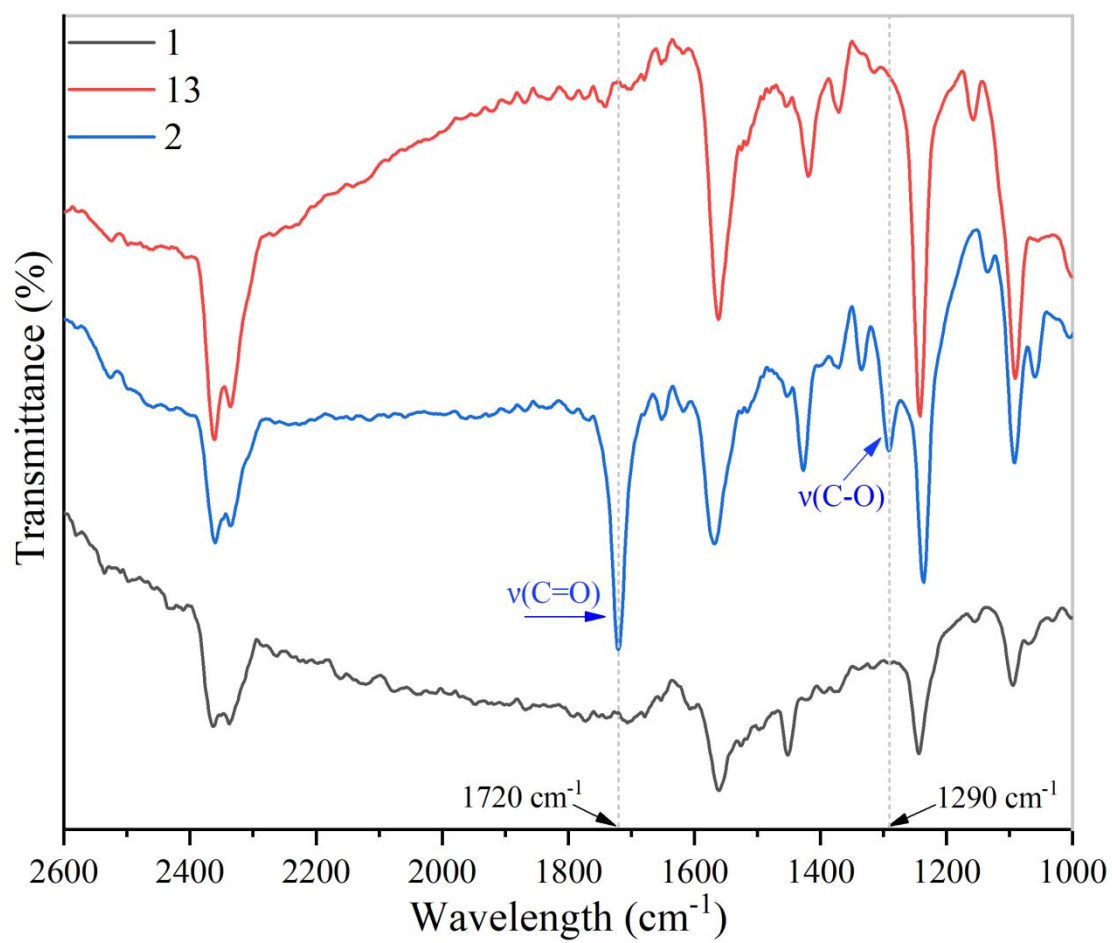

**Figure S5.** FT-IR of complexes 1, 2 and 13.
